# Supplementary material for: Injectable tissue adhesive composite hydrogel with fibroblasts for treating skin defects
Source: Royal Society of Chemistry journal article supplement (doi:10.1039/c7tb00384f), 2017-01-01
Supplement: c7tb00384f1.pdf [file c7tb00384f1.pdf]

*Electronic Supplementary Information*

**Injectable Tissue Adhesive Composite Hydrogel with Fibroblast for Treating Skin Defects**

Feiyan Zhu<sup>a</sup>, Chen Wang<sup>b</sup>, Saina Yang<sup>b</sup>, Qian Wang<sup>b</sup>, Fuxin Liang<sup>b</sup>, Chenyang Liu<sup>c</sup>, Dong Qiu<sup>b\*</sup>, Xiaozhong Qu<sup>ab\*</sup>, Zhongbo Hu<sup>a</sup>, Zhenzhong Yang<sup>b\*</sup>

a. College of Materials and Opto-Electronic Technology, University of Chinese Academy of Sciences, Beijing 100049, China.

b. State Key Laboratory of Polymer Physics and Chemistry, Institute of Chemistry, Chinese Academy of Sciences, Beijing 100190, China.

c. Key Laboratory of Engineering Plastics, Institute of Chemistry, Chinese Academy of Sciences, Beijing 100190, China.

\* Corresponding authors: dqiu@iccas.ac.cn (D.Q.), quxz@iccas.ac.cn (X.Q.), yangzz@iccas.ac.cn (Z.Y.)

**Supplementary figure**

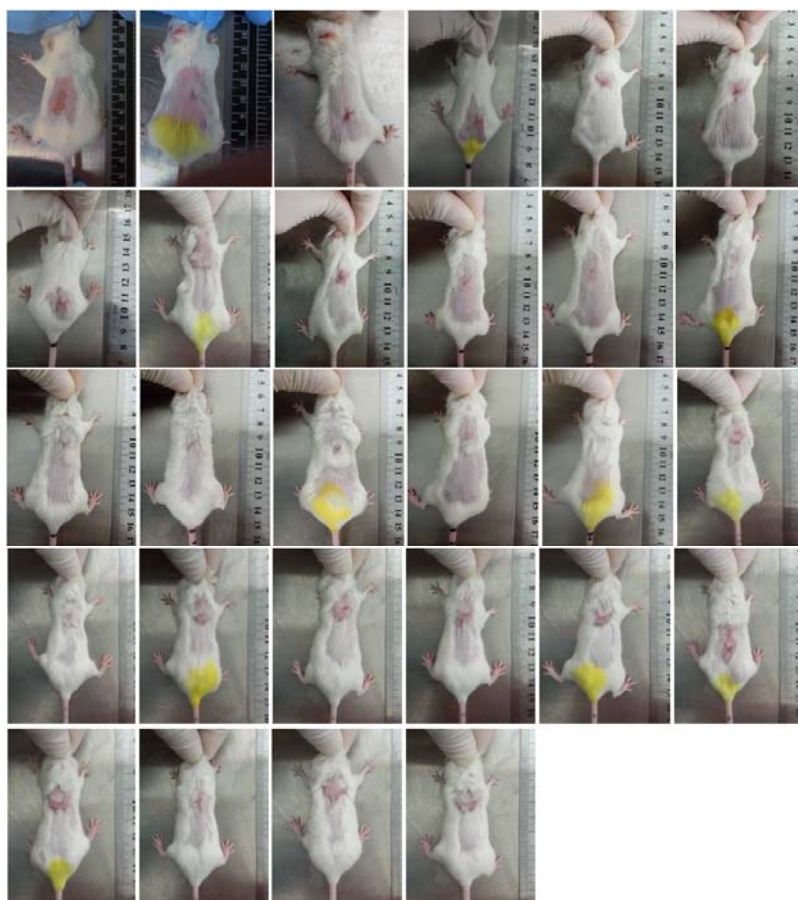

(a)

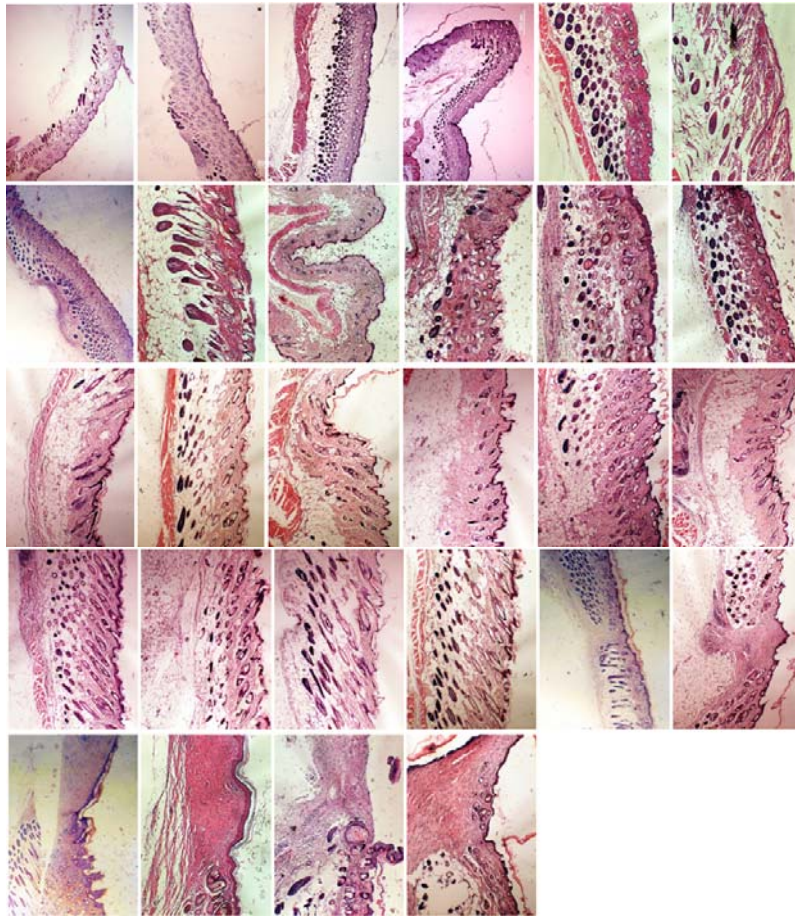

(b)

**Figure S1.** Photograph (a) and H&E stained histopathological sections (b) of mice with skin defect after being treated using L929 loaded GC100/SiNP10 hydrogel for 2 weeks.

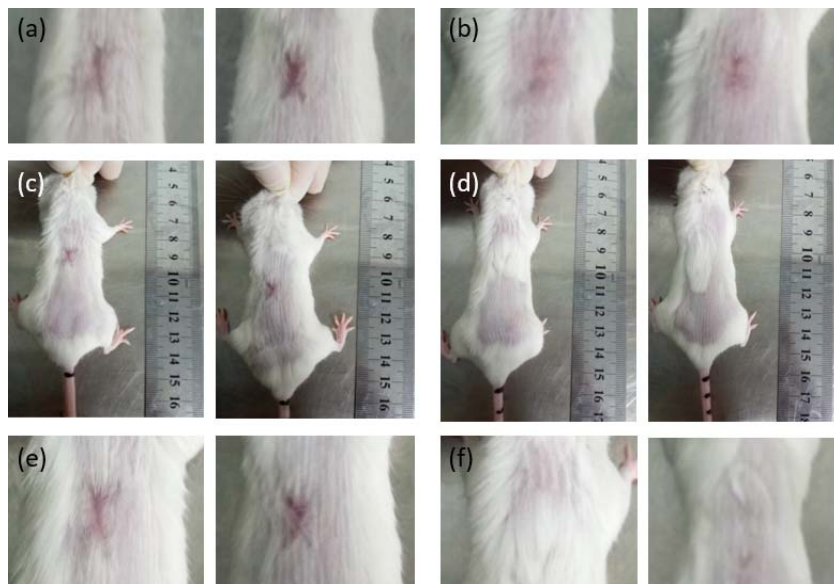

**Figure S2.** Morphology of the wounded back of mice after treated by PBS (control) (a, c, e) or L929 loaded GC/SiNP gel (b, d, f) for 4 weeks (a, b) and 8 weeks (c, d, e, f).
